# Supplementary material for: Prediction of radiation-induced hypothyroidism using radiomic data analysis does not show superiority over standard normal tissue complication models
Source: bioRxiv or medRxiv preprint supplement (doi:10.1101/2021.09.23.21264007), 2021-09-26
Supplement: Supplementary file [file media-1.zip]

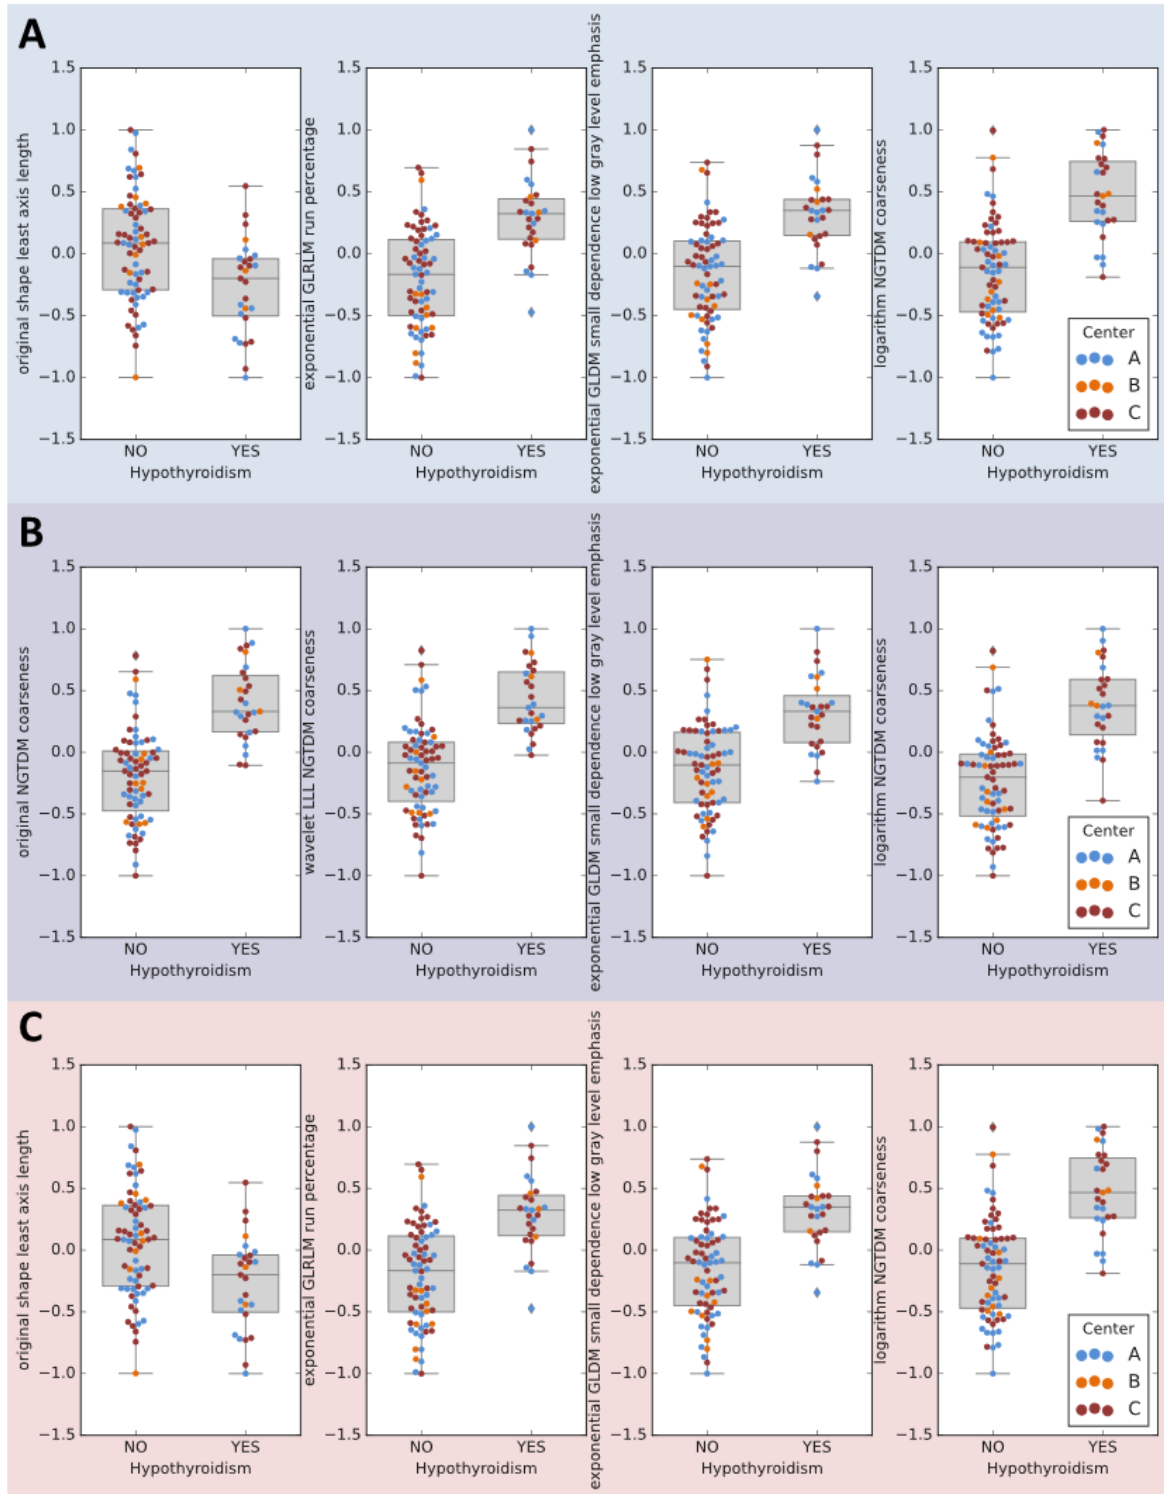

Suppl. Fig. 3: Transformed values of radiomic features retained in radiomic-clinical models. A: variant Ia, B: variant Ib, C: variant II.
