# Supplementary material for: Prediction of radiation-induced hypothyroidism using radiomic data analysis does not show superiority over standard normal tissue complication models
Source: bioRxiv or medRxiv preprint supplement (doi:10.1101/2021.09.23.21264007), 2021-09-26
Supplement: Supplementary file [file media-1.zip]

Suppl. Table 2: Tested model architectures and parameters

| LOGISTIC REGRESSION |                   |               |                    |
|---------------------|-------------------|---------------|--------------------|
| Symbol              | Regularization    | Class weights | Intercept          |
| LR <sub>B</sub>     | no regularization | balanced      | intercept excluded |
| LR <sub>BI</sub>    |                   |               | intercept included |
| LR <sub>E</sub>     |                   | equal         | intercept excluded |
| LR <sub>EI</sub>    |                   |               | intercept included |

| MULTILAYER PERCEPTRON (MLP) |                               |                         |
|-----------------------------|-------------------------------|-------------------------|
| Symbol                      | Training parameters           | Hidden layer(s) size(s) |
| MLP <sub>2</sub>            | learning rate: 0.1            | 2                       |
| MLP <sub>3</sub>            | no regularization             | 3                       |
| MLP <sub>4</sub>            | activation function: logistic | 4                       |
| MLP <sub>5</sub>            | max. iteration number: 1000   | 5                       |
| MLP <sub>3,3</sub>          |                               | 3, 3                    |
| MLP <sub>4,2</sub>          |                               | 4, 2                    |

| K NEAREST NEIGHBORS CLASSIFIER |                     |
|--------------------------------|---------------------|
| Symbol                         | Number of neighbors |
| KNN <sub>3</sub>               | 3                   |
| KNN <sub>5</sub>               | 5                   |
| KNN <sub>7</sub>               | 7                   |

| SUPPORT VECTOR CLASSIFIER (SVC) |               |        |                        |
|---------------------------------|---------------|--------|------------------------|
| Symbol                          | Class weights | Kernel | Probability estimation |
| SVC <sub>B</sub>                | balanced      | RBF    | enabled                |
| SVC <sub>E</sub>                | equal         | RBF    | enabled                |

| DECISION TREE   |               |
|-----------------|---------------|
| Symbol          | Class weights |
| DT <sub>B</sub> | balanced      |
| DT <sub>E</sub> | equal         |

| RANDOM FOREST    |               |                          |
|------------------|---------------|--------------------------|
| Symbol           | Class weights | Number of decision trees |
| RF <sub>3B</sub> | balanced      | 3                        |
| RF <sub>3E</sub> | equal         | 3                        |
| RF <sub>5B</sub> | balanced      | 5                        |
| RF <sub>5E</sub> | equal         | 5                        |

| ADA BOOST CLASSIFIER |                      |                      |
|----------------------|----------------------|----------------------|
| Symbol               | Basic estimator type | Number of estimators |
| AB <sub>3</sub>      | decision tree        | 3                    |
| AB <sub>5</sub>      | decision tree        | 5                    |

| OTHER MODELS |                                 |                   |
|--------------|---------------------------------|-------------------|
| Symbol       | Model type                      | Parameters        |
| GPC          | Gaussian process classifier     |                   |
| GNB          | Gaussian Naive Bayes classifier | priors=[0.5, 0.5] |
| QDA          | Quadratic discriminant analysis | priors=[0.5, 0.5] |
